# Supplementary material
Source: publisher figshare collection journal article supplement (https://karger.figshare.com/ndownloader/files/36405645)
Supplement: Supplementary file 1 [file 36405645]

**Table S1. An example of the search query in the Embase database**

| No. | Query Results | Results | Date |
| --- | --- | --- | --- |
| #77. | #72 AND #73 AND #75 AND [humans]/lim | 713 | 11-Dec-20 |
| #76. | #72 AND #73 AND #75 | 739 | 11-Dec-20 |
| #75. | #70 OR #74 | 3,955,298 | 11-Dec-20 |
| #74. | very elderly'/exp | 210,861 | 11-Dec-20 |
| #73. | #41 OR #42 OR #43 OR #44 OR #45 OR #46 OR #47 OR #48 | 63,743 | 11-Dec-20 |
| #72. | #40 OR #71 | 1,113,883 | 11-Dec-20 |
| #71. | echography:ab,kw,ti | 8,217 | 11-Dec-20 |
| #70. | #49 OR #50 OR #51 OR #52 OR #53 OR #54 OR #55 OR #56 OR #57 OR #58 OR #59 OR #60 OR #61 OR #62 OR #63 OR #64 OR #65 OR #66 OR #67 OR #68 OR #69 | 3,955,298 | 11-Dec-20 |
| #69. | senium:ab,kw,ti | 168 | 11-Dec-20 |
| #68. | senior AND citizen:ab,kw,ti | 502 | 11-Dec-20 |
| #67. | elderly AND subject:ab,kw,ti | 9,437 | 11-Dec-20 |
| #66. | elderly AND person:ab,kw,ti | 13,198 | 11-Dec-20 |
| #65. | elderly AND people:ab,kw,ti | 66,829 | 11-Dec-20 |
| #64. | elderly AND patient:ab,kw,ti | 128,726 | 11-Dec-20 |
| #63. | aged AND subject:ab,kw,ti | 58,277 | 11-Dec-20 |
| #62. | aged AND person:ab,kw,ti | 58,918 | 11-Dec-20 |
| #61. | aged AND people:ab,kw,ti | 195,901 | 11-Dec-20 |
| #60. | aged AND patient:ab,kw,ti | 955,011 | 11-Dec-20 |
| #59. | older AND adults:ab,kw,ti | 149,984 | 11-Dec-20 |
| #58. | ageing:ab,kw,ti | 62,587 | 11-Dec-20 |
| #57. | seniors:ab,kw,ti | 10,355 | 11-Dec-20 |
| #56. | senior:ab,kw,ti | 48,811 | 11-Dec-20 |
| #55. | older AND people:ab,kw,ti | 75,397 | 11-Dec-20 |
| #54. | older AND person:ab,kw,ti | 18,322 | 11-Dec-20 |
| #53. | elder:ab,kw,ti | 13,550 | 11-Dec-20 |
| #52. | older AND adult:ab,kw,ti | 51,844 | 11-Dec-20 |
| #51. | aging:ab,kw,ti | 262,566 | 11-Dec-20 |
| #50. | elderly:ab,kw,ti | 365,065 | 11-Dec-20 |
| #49. | aged'/exp | 3,189,665 | 11-Dec-20 |
| #48. | muscle AND wasting:ab,kw,ti | 11,118 | 11-Dec-20 |
| #47. | muscle AND atrophies:ab,kw,ti | 579 | 11-Dec-20 |
| #46. | muscle AND atrophy:ab,kw,ti | 34,109 | 11-Dec-20 |
| #45. | muscular AND atrophies:ab,kw,t | 540 | 11-Dec-20 |
| #44. | muscular AND atrophy:ab,kw,ti | 15,325 | 11-Dec-20 |
| #43. | sarcopenia:ab,kw,ti | 14,986 | 11-Dec-20 |
| #42. | sarcopenias:ab,kw,ti | 2 | 11-Dec-20 |
| #41. | sarcopenia'/exp | 11,670 | 11-Dec-20 |
| #40. | #1 OR #2 OR #3 OR #4 OR #5 OR #6 OR #7 OR #8 OR #9 OR #10 OR #11 OR #12 OR #13 OR #14 OR #15 OR #16 OR #17 OR #18 OR #19 OR #20 OR #21 OR #22 OR #23 OR #24 OR #25 OR #26 OR #27 OR #28 OR #29 OR #30 OR #31 OR #32 OR #33 OR #34 OR #35 OR #36 OR #37 OR #38 OR #39 | 1,112,551 | 11-Dec-20 |
| #39. | computer AND echotomography:ab,kw,ti | 105 | 11-Dec-20 |
| #38. | ultrasound:ab,kw,ti | 405,879 | 11-Dec-20 |
| #37. | ultrasound AND scanning:ab,kw,ti | 16,390 | 11-Dec-20 |
| #36. | ultrasound AND diagnosis:ab,kw,ti | 123,052 | 11-Dec-20 |
| #35. | ultrasonographic AND screening:ab,kw,ti | 1,926 | 11-Dec-20 |
| #34. | ultrasonographic AND examination:ab,kw,ti | 8,439 | 11-Dec-20 |
| #33. | ultrasonogram:ab,kw,ti | 1,280 | 11-Dec-20 |
| #32. | ultrasonic AND scintillation:ab,kw,ti | 17 | 11-Dec-20 |
| #31. | ultrasonic AND scanning:ab,kw,ti | 3,977 | 11-Dec-20 |
| #30. | ultrasonic AND examination:ab,kw,ti | 5,090 | 11-Dec-20 |
| #29. | ultrasonic AND echo:ab,kw,ti | 2,255 | 11-Dec-20 |
| #28. | ultrasonic AND detection:ab,kw,ti | 4,923 | 11-Dec-20 |
| #27. | sonography:ab,kw,ti | 46,900 | 11-Dec-20 |
| #26. | sonographic AND screening:ab,kw,ti | 2,176 | 11-Dec-20 |
| #25. | sonographic AND examination:ab,kw,ti | 7,560 | 11-Dec-20 |
| #24. | sonogram:ab,kw,ti | 2,445 | 11-Dec-20 |
| #23. | high AND resolution AND echography:ab,kw,ti | 168 | 11-Dec-20 |
| #22. | echosound:ab,kw,ti | 13 | 11-Dec-20 |
| #21. | echoscopy:ab,kw,ti | 68 | 11-Dec-20 |
| #20. | echographic AND evaluation:ab,kw,ti | 802 | 11-Dec-20 |
| #19. | echogram:ab,kw,ti | 654 | 11-Dec-20 |
| #18. | duplex AND echography:ab,kw,ti | 92 | 11-Dec-20 |
| #17. | diagnostic AND ultrasonic AND method:ab,kw,ti | 1,728 | 11-Dec-20 |
| #16. | diagnostic AND ultrasonic AND imaging:ab,kw,ti | 2,062 | 11-Dec-20 |
| #15. | diagnostic AND ultrasonic AND examination:ab,kw,ti | 1,291 | 11-Dec-20 |
| #14. | ultrasonic AND tomography:ab,kw,ti | 2,037 | 11-Dec-20 |
| #13. | ultrasonic AND diagnosis:ab,ti,kw | 8,364 | 11-Dec-20 |
| #12. | ultrasonic AND diagnoses:ab,ti,kw | 328 | 11-Dec-20 |
| #11. | ultrasonographic AND imagings:ab,ti,kw | 15 | 11-Dec-20 |
| #10. | ultrasonographic AND imaging:ab,ti,kw | 5,018 | 11-Dec-20 |
| #9. | medical AND sonography:ab,ti,kw | 17,288 | 11-Dec-20 |
| #8. | ultrasonic AND imaging:ab,ti,kw | 6,939 | 11-Dec-20 |
| #7. | echotomography:ab,ti,kw | 802 | 11-Dec-20 |
| #6. | ultrasound AND imagings:ab,ti,kw | 126 | 11-Dec-20 |
| #5. | ultrasound AND imaging:ab,ti,kw | 110,757 | 11-Dec-20 |
| #4. | diagnostic AND ultrasounds:ab,ti,kw | 1,342 | 11-Dec-20 |
| #3. | diagnostic AND ultrasound:ab,ti,kw | 100,658 | 11-Dec-20 |
| #2. | ultrasonography:ab,ti,kw | 141,104 | 11-Dec-20 |
| #1. | echography'/exp | 856,039 | 11-Dec-20 |
